# Supplementary material for: Comparative Analysis of the Gut Microbiota of Adult Mosquitoes From Eight Locations in Hainan, China
Source: Front Cell Infect Microbiol. 2020 Dec 15;10:596750. doi: 10.3389/fcimb.2020.596750 (PMC7769952; doi:10.3389/fcimb.2020.596750)
Supplement: Supplementary file 6 [file Table_4.xlsx]

## Sheet: Bray-Curtis distances 
Table S4 Bray-Curtis distances between microbial communities of six mosquito species from eight states.
bray_curtis_Beta_diversity	DA-AAL	DA-CPA	HK-AAL	HK-ASU	HK-CGE	HK-CPI	LD-AAL	LS-AAL	LS-AGA	SY-AAL	SY-ASU	TC-AAL	TC-CPA	WC-AAL	WC-ASU	WC-CPA	WZS-AAL	WZS-ASU	WZS-CPI
DA-AAL	0	0.901446	0.921258	0.750795	0.745372	0.86269	0.945915	0.490962	0.61786	0.31974	0.963124	0.613341	0.568872	0.606182	0.976067	0.969197	0.991612	0.935286	0.982104
DA-CPA	0.901446	0	0.890419	0.83684	0.683659	0.83261	0.975343	0.986768	0.990745	0.987274	0.970897	0.996999	0.987744	0.928055	0.977043	0.974657	0.995192	0.942191	0.982646
HK-AAL	0.921258	0.890419	0	0.774729	0.941323	0.813847	0.903435	0.941251	0.754628	0.963304	0.381092	0.989009	0.942119	0.846963	0.915365	0.904483	0.9547	0.907195	0.983839
HK-ASU	0.750795	0.83684	0.774729	0	0.66457	0.728272	0.887202	0.82397	0.785539	0.843167	0.858134	0.85893	0.859508	0.727513	0.937346	0.903435	0.992408	0.921475	0.981815
HK-CGE	0.745372	0.683659	0.941323	0.66457	0	0.720174	0.932719	0.791323	0.790889	0.809074	0.965835	0.811244	0.778597	0.741685	0.978019	0.945228	0.993962	0.933333	0.982683
HK-CPI	0.86269	0.83261	0.813847	0.728272	0.720174	0	0.804375	0.901735	0.923933	0.90376	0.944939	0.959328	0.874367	0.648915	0.800542	0.850108	0.816775	0.719306	0.979393
LD-AAL	0.945915	0.975343	0.903435	0.887202	0.932719	0.804375	0	0.761208	0.852314	0.865329	0.965329	0.873283	0.842155	0.783912	0.981562	0.688792	0.971981	0.882755	0.986479
LS-AAL	0.490962	0.986768	0.941251	0.82397	0.791323	0.901735	0.761208	0	0.549855	0.292914	0.976681	0.498771	0.577657	0.616269	0.992842	0.965004	0.988937	0.973861	0.993962
LS-AGA	0.61786	0.990745	0.754628	0.785539	0.790889	0.923933	0.852314	0.549855	0	0.596782	0.780513	0.711461	0.540998	0.758568	0.965365	0.969125	0.987816	0.96457	0.993854
SY-AAL	0.31974	0.987274	0.963304	0.843167	0.809074	0.90376	0.865329	0.292914	0.596782	0	0.972343	0.586189	0.5641	0.639262	0.974476	0.980188	0.987491	0.911063	0.996746
SY-ASU	0.963124	0.970897	0.381092	0.858134	0.965835	0.944939	0.965329	0.976681	0.780513	0.972343	0	0.988142	0.980839	0.951735	0.938684	0.969704	0.984635	0.955278	0.982176
TC-AAL	0.613341	0.996999	0.989009	0.85893	0.811244	0.959328	0.873283	0.498771	0.711461	0.586189	0.988142	0	0.7359	0.487816	0.996493	0.996276	0.993745	0.839009	0.994722
TC-CPA	0.568872	0.987744	0.942119	0.859508	0.778597	0.874367	0.842155	0.577657	0.540998	0.5641	0.980839	0.7359	0	0.725307	0.993673	0.920571	0.990383	0.969414	0.993384
WC-AAL	0.606182	0.928055	0.846963	0.727513	0.741685	0.648915	0.783912	0.616269	0.758568	0.639262	0.951735	0.487816	0.725307	0	0.830441	0.82679	0.844939	0.65658	0.984346
WC-ASU	0.976067	0.977043	0.915365	0.937346	0.978019	0.800542	0.981562	0.992842	0.965365	0.974476	0.938684	0.996493	0.993673	0.830441	0	0.974078	0.609725	0.815654	0.982574
WC-CPA	0.969197	0.974657	0.904483	0.903435	0.945228	0.850108	0.688792	0.965004	0.969125	0.980188	0.969704	0.996276	0.920571	0.82679	0.974078	0	0.97961	0.965221	0.993854
WZS-AAL	0.991612	0.995192	0.9547	0.992408	0.993962	0.816775	0.971981	0.988937	0.987816	0.987491	0.984635	0.993745	0.990383	0.844939	0.609725	0.97961	0	0.815148	0.751952
WZS-ASU	0.935286	0.942191	0.907195	0.921475	0.933333	0.719306	0.882755	0.973861	0.96457	0.911063	0.955278	0.839009	0.969414	0.65658	0.815654	0.965221	0.815148	0	0.961208
WZS-CPI	0.982104	0.982646	0.983839	0.981815	0.982683	0.979393	0.986479	0.993962	0.993854	0.996746	0.982176	0.994722	0.993384	0.984346	0.982574	0.993854	0.751952	0.961208	0

## Sheet: Unweighted unifrac β-diversity
Table S4 Unweighted unifrac Beta diversity between microbial communities of six mosquito species from eight states.
Unweighted_unifrac_Beta_diversity	DA-AAL	DA-CPA	HK-AAL	HK-ASU	HK-CGE	HK-CPI	LD-AAL	LS-AAL	LS-AGA	SY-AAL	SY-ASU	TC-AAL	TC-CPA	WC-AAL	WC-ASU	WC-CPA	WZS-AAL	WZS-ASU	WZS-CPI
DA-AAL	0	0.321854	0.535159	0.544199	0.728331	0.53248	0.598268	0.625914	0.636503	0.610643	0.761073	0.70207	0.601816	0.370131	0.701142	0.55891	0.776949	0.710348	0.785983
DA-CPA	0.321854	0	0.553389	0.581537	0.749615	0.554498	0.605784	0.666217	0.650843	0.628439	0.766507	0.737089	0.624577	0.373511	0.703014	0.576924	0.768614	0.734536	0.801188
HK-AAL	0.535159	0.553389	0	0.456222	0.672235	0.519941	0.524452	0.548295	0.527395	0.516614	0.690989	0.621159	0.517953	0.599516	0.591618	0.479731	0.667238	0.609907	0.708962
HK-ASU	0.544199	0.581537	0.456222	0	0.591649	0.558978	0.563044	0.481195	0.449007	0.489463	0.683343	0.557519	0.474389	0.590347	0.533065	0.439023	0.646952	0.580917	0.68555
HK-CGE	0.728331	0.749615	0.672235	0.591649	0	0.783829	0.772592	0.622985	0.577841	0.5444	0.754913	0.499367	0.572443	0.802278	0.308298	0.557425	0.71059	0.585167	0.644641
HK-CPI	0.53248	0.554498	0.519941	0.558978	0.783829	0	0.537187	0.686983	0.642927	0.673478	0.769132	0.757243	0.644082	0.503478	0.729705	0.586571	0.741873	0.748869	0.816764
LD-AAL	0.598268	0.605784	0.524452	0.563044	0.772592	0.537187	0	0.649435	0.616286	0.626424	0.761899	0.726988	0.650006	0.592088	0.726586	0.56224	0.604796	0.723736	0.761408
LS-AAL	0.625914	0.666217	0.548295	0.481195	0.622985	0.686983	0.649435	0	0.420433	0.501775	0.701378	0.536293	0.474725	0.695209	0.570139	0.476146	0.632241	0.527837	0.657298
LS-AGA	0.636503	0.650843	0.527395	0.449007	0.577841	0.642927	0.616286	0.420433	0	0.485408	0.677904	0.477464	0.350595	0.681748	0.518682	0.455542	0.594067	0.512932	0.611608
SY-AAL	0.610643	0.628439	0.516614	0.489463	0.5444	0.673478	0.626424	0.501775	0.485408	0	0.670142	0.490782	0.448096	0.681161	0.488711	0.403776	0.652738	0.542105	0.641252
SY-ASU	0.761073	0.766507	0.690989	0.683343	0.754913	0.769132	0.761899	0.701378	0.677904	0.670142	0	0.73926	0.702727	0.792482	0.691482	0.68705	0.774828	0.727279	0.791862
TC-AAL	0.70207	0.737089	0.621159	0.557519	0.499367	0.757243	0.726988	0.536293	0.477464	0.490782	0.73926	0	0.438132	0.770952	0.470827	0.566815	0.607279	0.465306	0.508172
TC-CPA	0.601816	0.624577	0.517953	0.474389	0.572443	0.644082	0.650006	0.474725	0.350595	0.448096	0.702727	0.438132	0	0.665456	0.526368	0.467697	0.609157	0.505671	0.603782
WC-AAL	0.370131	0.373511	0.599516	0.590347	0.802278	0.503478	0.592088	0.695209	0.681748	0.681161	0.792482	0.770952	0.665456	0	0.763314	0.62965	0.782329	0.769062	0.830432
WC-ASU	0.701142	0.703014	0.591618	0.533065	0.308298	0.729705	0.726586	0.570139	0.518682	0.488711	0.691482	0.470827	0.526368	0.763314	0	0.493476	0.665475	0.538454	0.59513
WC-CPA	0.55891	0.576924	0.479731	0.439023	0.557425	0.586571	0.56224	0.476146	0.455542	0.403776	0.68705	0.566815	0.467697	0.62965	0.493476	0	0.616523	0.563673	0.668639
WZS-AAL	0.776949	0.768614	0.667238	0.646952	0.71059	0.741873	0.604796	0.632241	0.594067	0.652738	0.774828	0.607279	0.609157	0.782329	0.665475	0.616523	0	0.622178	0.550354
WZS-ASU	0.710348	0.734536	0.609907	0.580917	0.585167	0.748869	0.723736	0.527837	0.512932	0.542105	0.727279	0.465306	0.505671	0.769062	0.538454	0.563673	0.622178	0	0.488778
WZS-CPI	0.785983	0.801188	0.708962	0.68555	0.644641	0.816764	0.761408	0.657298	0.611608	0.641252	0.791862	0.508172	0.603782	0.830432	0.59513	0.668639	0.550354	0.488778	0

## Sheet: Weighted unifrac β-diversity
Table S4 Weighted unifrac Beta diversity between microbial communities of six mosquito species from eight states.
Weighted_unifrac_Beta_diversity	DA-AAL	DA-CPA	HK-AAL	HK-ASU	HK-CGE	HK-CPI	LD-AAL	LS-AAL	LS-AGA	SY-AAL	SY-ASU	TC-AAL	TC-CPA	WC-AAL	WC-ASU	WC-CPA	WZS-AAL	WZS-ASU	WZS-CPI
DA-AAL	0	0.460322	0.202555	0.412443	0.452504	0.512449	0.57563	0.146173	0.258052	0.0658528	0.1179	0.285069	0.40263	0.400178	1.05211	0.807551	0.920767	0.679801	0.553173
DA-CPA	0.460322	0	0.443341	0.401131	0.394225	0.415038	0.442735	0.434399	0.502895	0.458543	0.467932	0.3489	0.587445	0.444157	1.0405	0.819844	0.793438	0.516678	0.39245
HK-AAL	0.202555	0.443341	0	0.345496	0.451499	0.390283	0.481764	0.210932	0.239032	0.216739	0.201633	0.304359	0.384505	0.341103	0.998007	0.709538	0.871316	0.622112	0.550975
HK-ASU	0.412443	0.401131	0.345496	0	0.191093	0.369086	0.368567	0.383729	0.420489	0.404765	0.434911	0.265547	0.503254	0.364727	1.09906	0.807808	0.856839	0.445514	0.306687
HK-CGE	0.452504	0.394225	0.451499	0.191093	0	0.458038	0.397173	0.38816	0.438937	0.415552	0.432949	0.246341	0.546586	0.440728	1.12244	0.867541	0.868656	0.44025	0.145209
HK-CPI	0.512449	0.415038	0.390283	0.369086	0.458038	0	0.281467	0.473485	0.471683	0.51988	0.542241	0.401326	0.488644	0.248511	0.93196	0.624547	0.679839	0.403358	0.505846
LD-AAL	0.57563	0.442735	0.481764	0.368567	0.397173	0.281467	0	0.479424	0.485691	0.550473	0.571588	0.377765	0.536639	0.372741	1.06432	0.573191	0.808201	0.451033	0.444664
LS-AAL	0.146173	0.434399	0.210932	0.383729	0.38816	0.473485	0.479424	0	0.192289	0.099961	0.157493	0.173953	0.369051	0.375215	1.05451	0.80707	0.878937	0.636876	0.494308
LS-AGA	0.258052	0.502895	0.239032	0.420489	0.438937	0.471683	0.485691	0.192289	0	0.222377	0.272098	0.273552	0.345641	0.359236	1.041	0.776172	0.868569	0.620778	0.556151
SY-AAL	0.0658528	0.458543	0.216739	0.404765	0.415552	0.51988	0.550473	0.099961	0.222377	0	0.09291	0.233466	0.375604	0.404383	1.04661	0.811704	0.899992	0.660659	0.513591
SY-ASU	0.1179	0.467932	0.201633	0.434911	0.432949	0.542241	0.571588	0.157493	0.272098	0.09291	0	0.266117	0.437198	0.447991	1.02344	0.78709	0.907455	0.666213	0.512045
TC-AAL	0.285069	0.3489	0.304359	0.265547	0.246341	0.401326	0.377765	0.173953	0.273552	0.233466	0.266117	0	0.386968	0.317869	1.03923	0.81029	0.794765	0.503914	0.336087
TC-CPA	0.40263	0.587445	0.384505	0.503254	0.546586	0.488644	0.536639	0.369051	0.345641	0.375604	0.437198	0.386968	0	0.335116	0.980228	0.790889	0.723293	0.505155	0.672763
WC-AAL	0.400178	0.444157	0.341103	0.364727	0.440728	0.248511	0.372741	0.375215	0.359236	0.404383	0.447991	0.317869	0.335116	0	0.884203	0.676912	0.688461	0.437852	0.564525
WC-ASU	1.05211	1.0405	0.998007	1.09906	1.12244	0.93196	1.06432	1.05451	1.041	1.04661	1.02344	1.03923	0.980228	0.884203	0	1.04239	0.762153	0.861316	1.13178
WC-CPA	0.807551	0.819844	0.709538	0.807808	0.867541	0.624547	0.573191	0.80707	0.776172	0.811704	0.78709	0.81029	0.790889	0.676912	1.04239	0	0.980255	0.840257	0.893062
WZS-AAL	0.920767	0.793438	0.871316	0.856839	0.868656	0.679839	0.808201	0.878937	0.868569	0.899992	0.907455	0.794765	0.723293	0.688461	0.762153	0.980255	0	0.475469	0.865156
WZS-ASU	0.679801	0.516678	0.622112	0.445514	0.44025	0.403358	0.451033	0.636876	0.620778	0.660659	0.666213	0.503914	0.505155	0.437852	0.861316	0.840257	0.475469	0	0.449294
WZS-CPI	0.553173	0.39245	0.550975	0.306687	0.145209	0.505846	0.444664	0.494308	0.556151	0.513591	0.512045	0.336087	0.672763	0.564525	1.13178	0.893062	0.865156	0.449294	0
